# Supplementary material for: Neuroprotective effects of a Coeloglossum viride var. Bracteatum extract in vitro and in vivo
Source: PubMed Central journal article supplement (PMC5569100; doi:10.1038/s41598-017-08957-0), 2017-08-23

# Supplementary Information

## **Neuroprotective effect of coeloglossum viride var. bracteatum extract *in vitro* and *in vivo***

Rui-Yuan Pan<sup>1,2,3</sup>, Jun Ma<sup>2,3</sup>, Huan-Tong Wu<sup>1</sup>, Qing-Shan Liu<sup>1</sup>, Xiao-Yan Qin<sup>1\*</sup>, Yong Cheng<sup>1\*</sup>

<sup>1</sup> Center on translational neuroscience, College of Life & Environmental Science, Minzu University of China, Beijing 100081, China

<sup>2</sup> State Key Laboratory of Brain and Cognitive Sciences, Institute of Biophysics, Chinese Academy of Sciences, Beijing 100101, China

<sup>3</sup> College of Life Sciences, University of Chinese Academy of Sciences, Beijing 100049, China

Figure 2

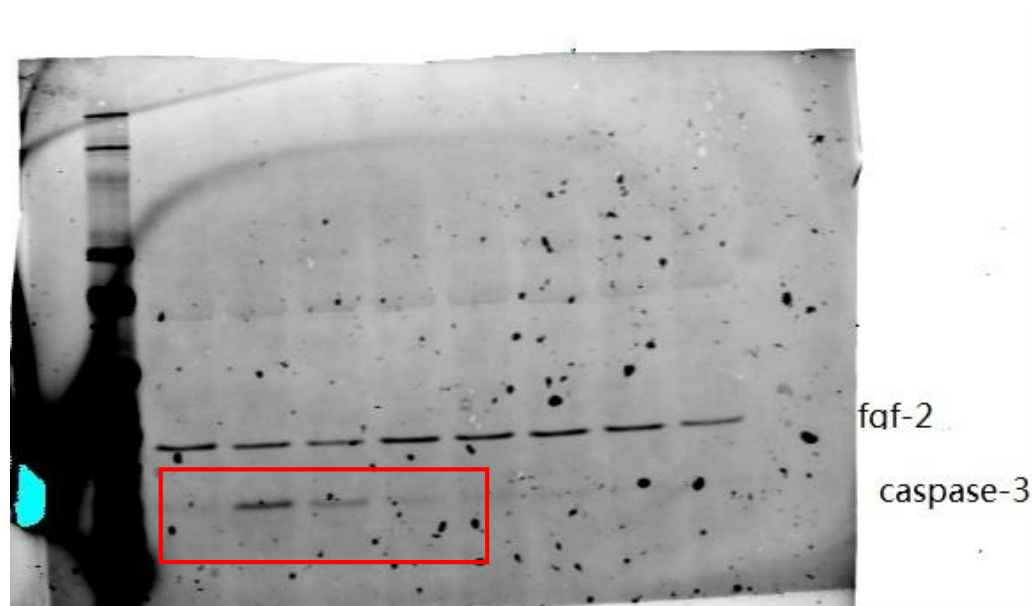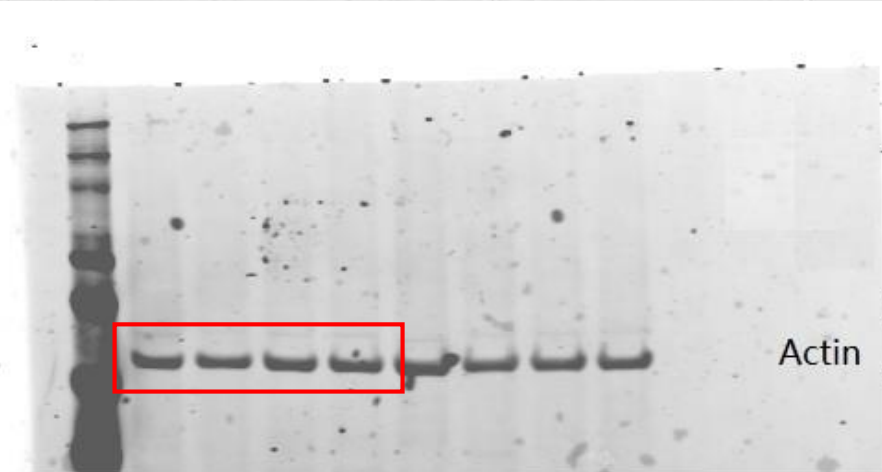

Figure 4

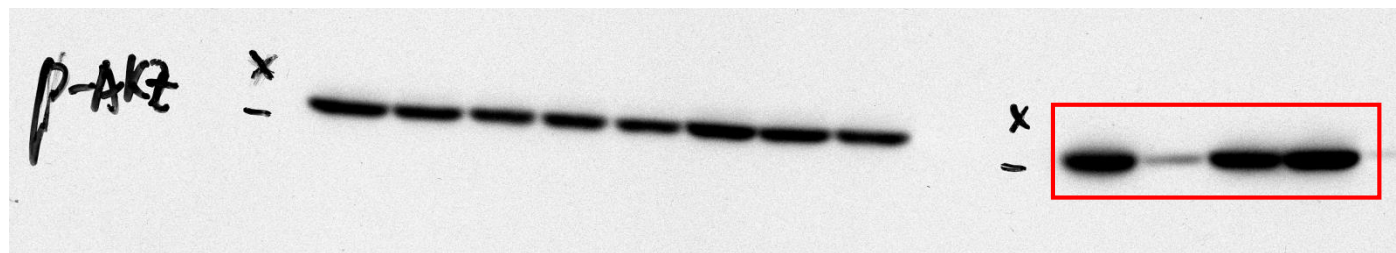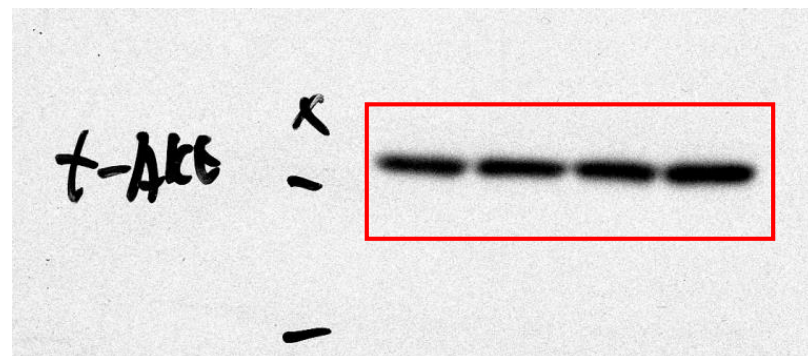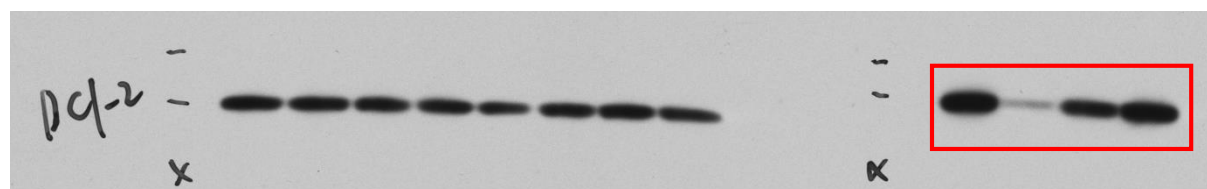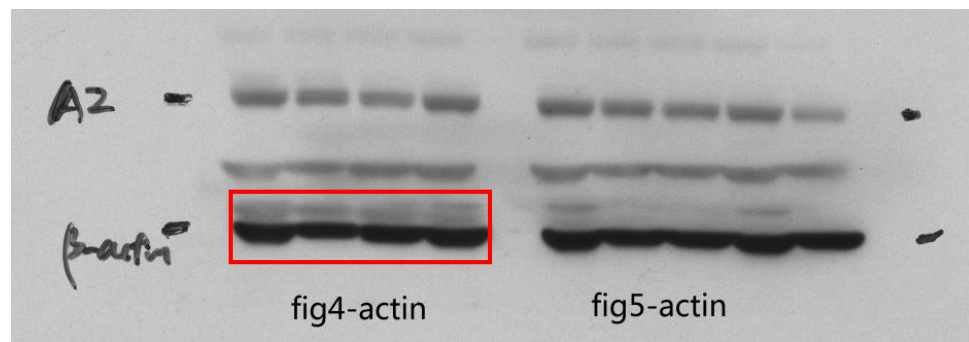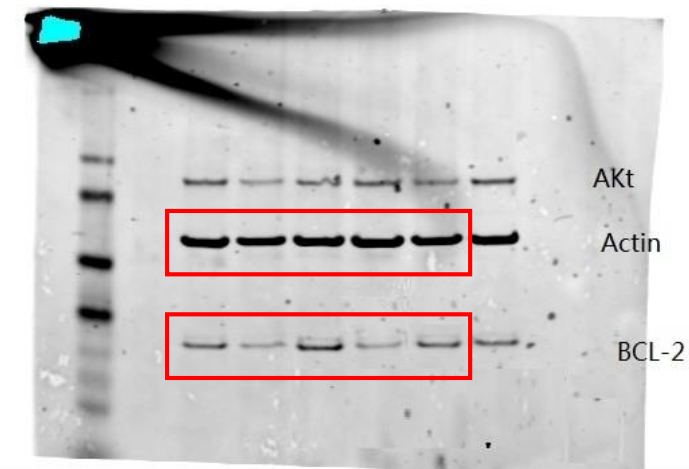

Figure 5

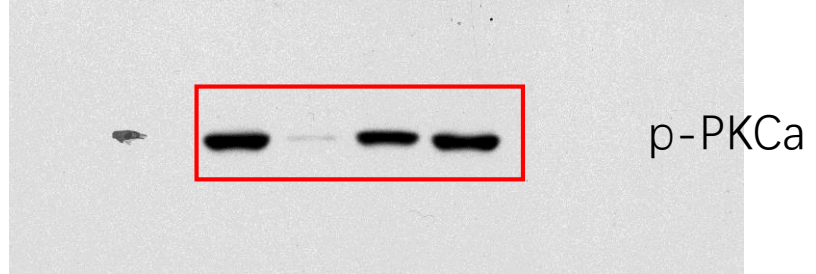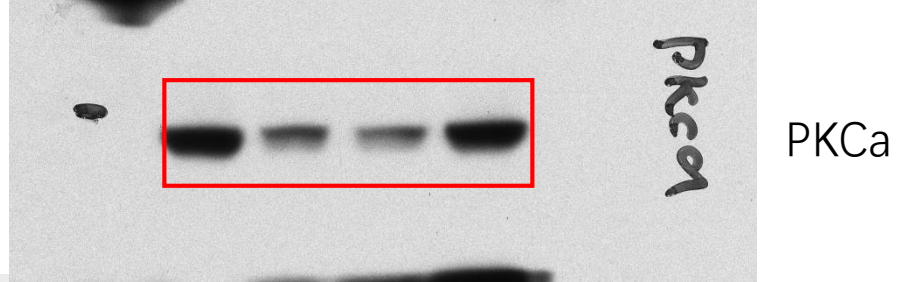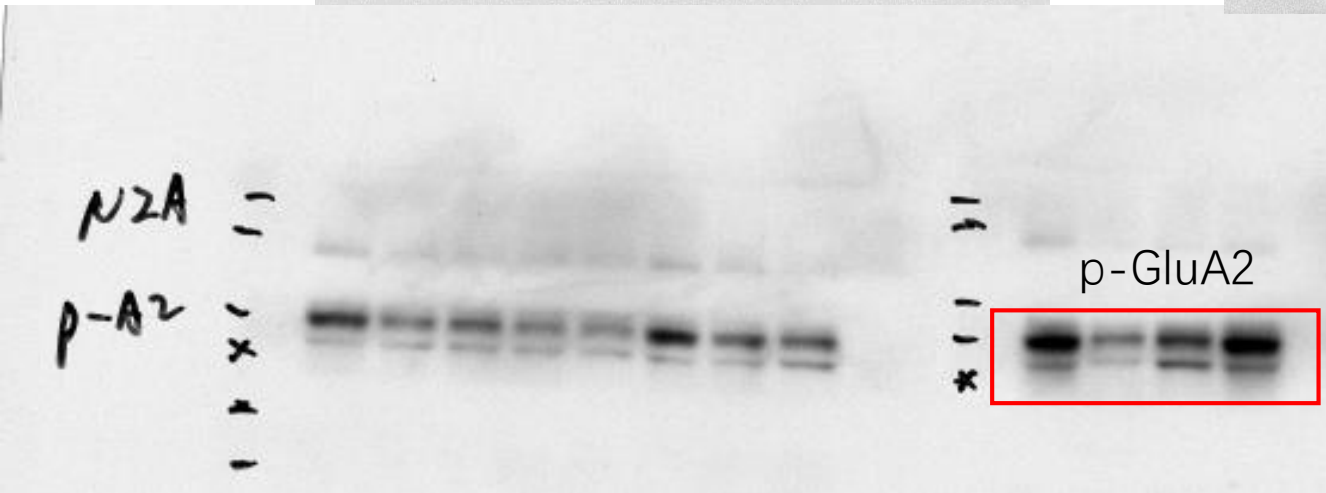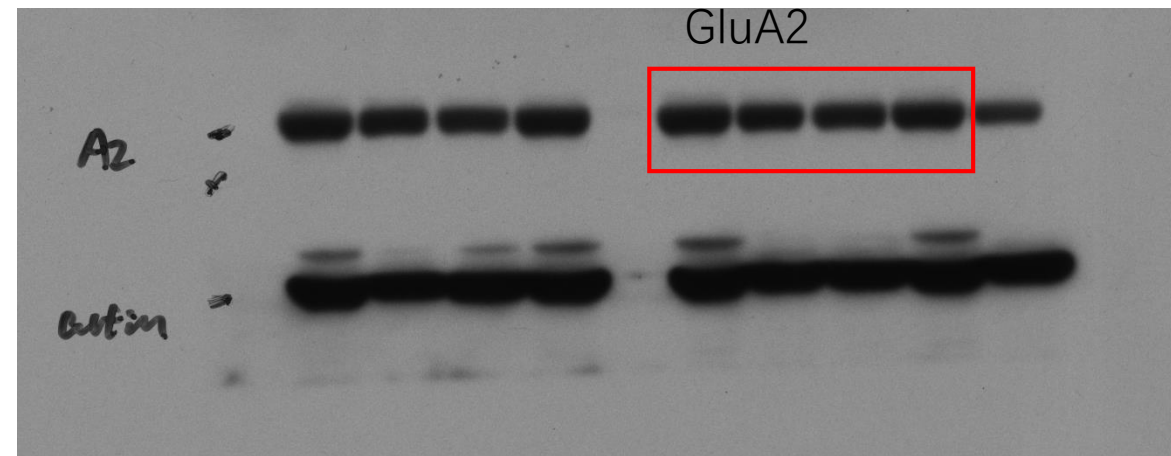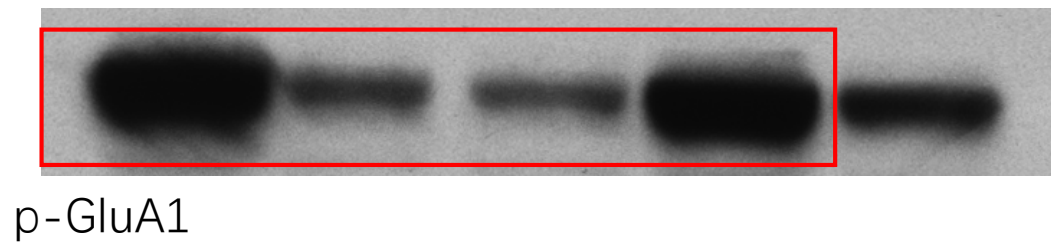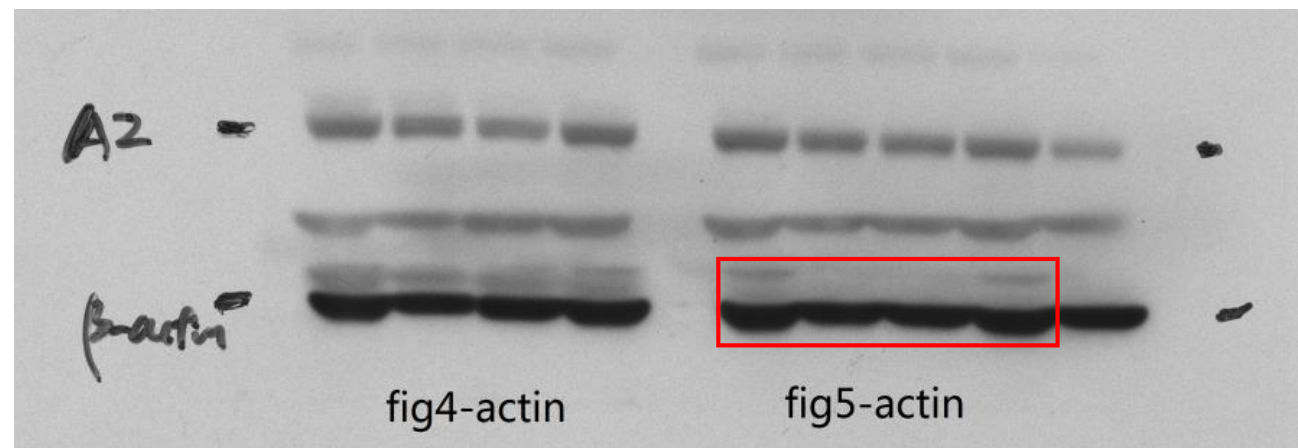

Figure 6

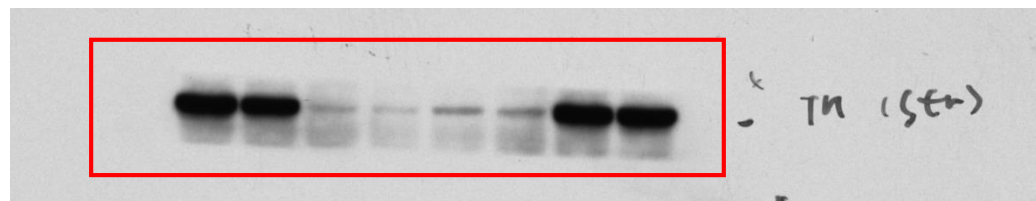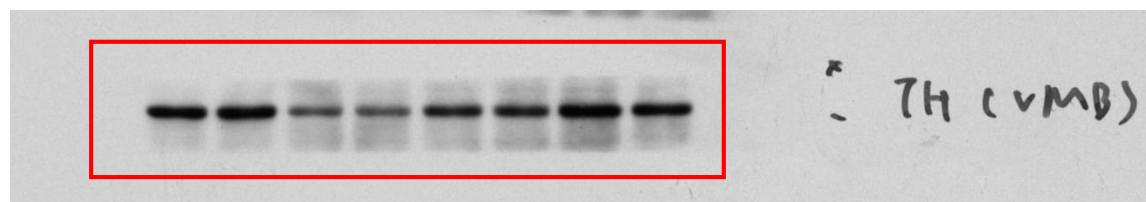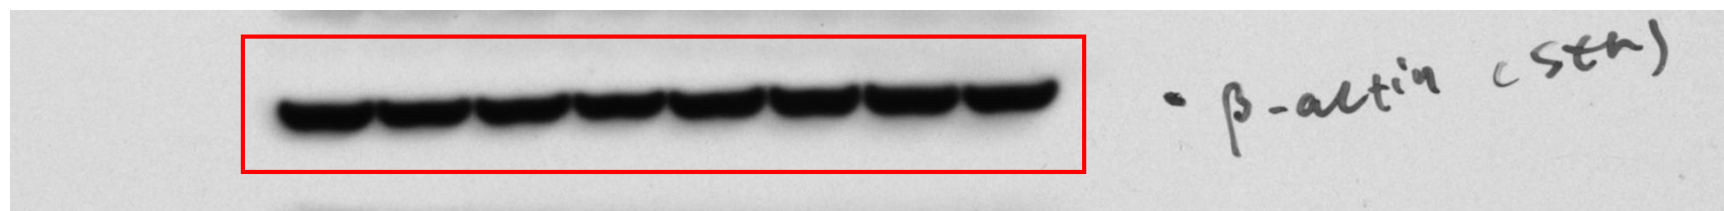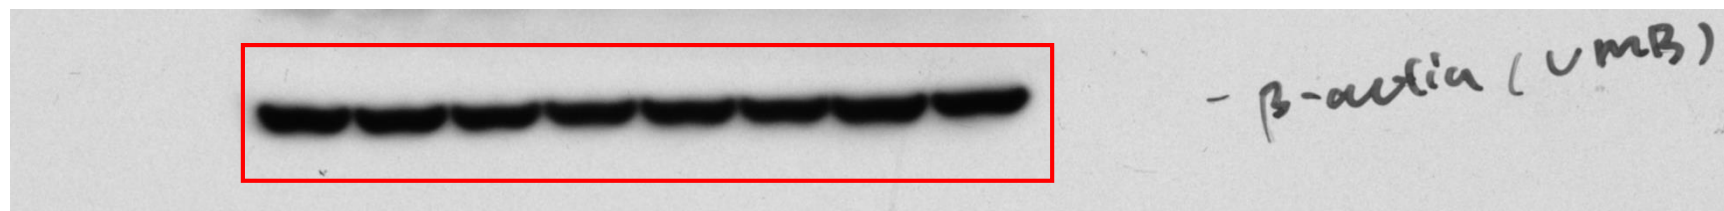

Supplement: 41598_2017_8957_MOESM1_ESM.pdf [file 41598_2017_8957_MOESM1_ESM.pdf]
